# Supplementary figures and images for: Virus Shedding of Avian Influenza in Poultry: A Systematic Review and Meta-Analysis
Source: MDPI journal article supplement (doi:10.3390/v11090812), 2019-09-02

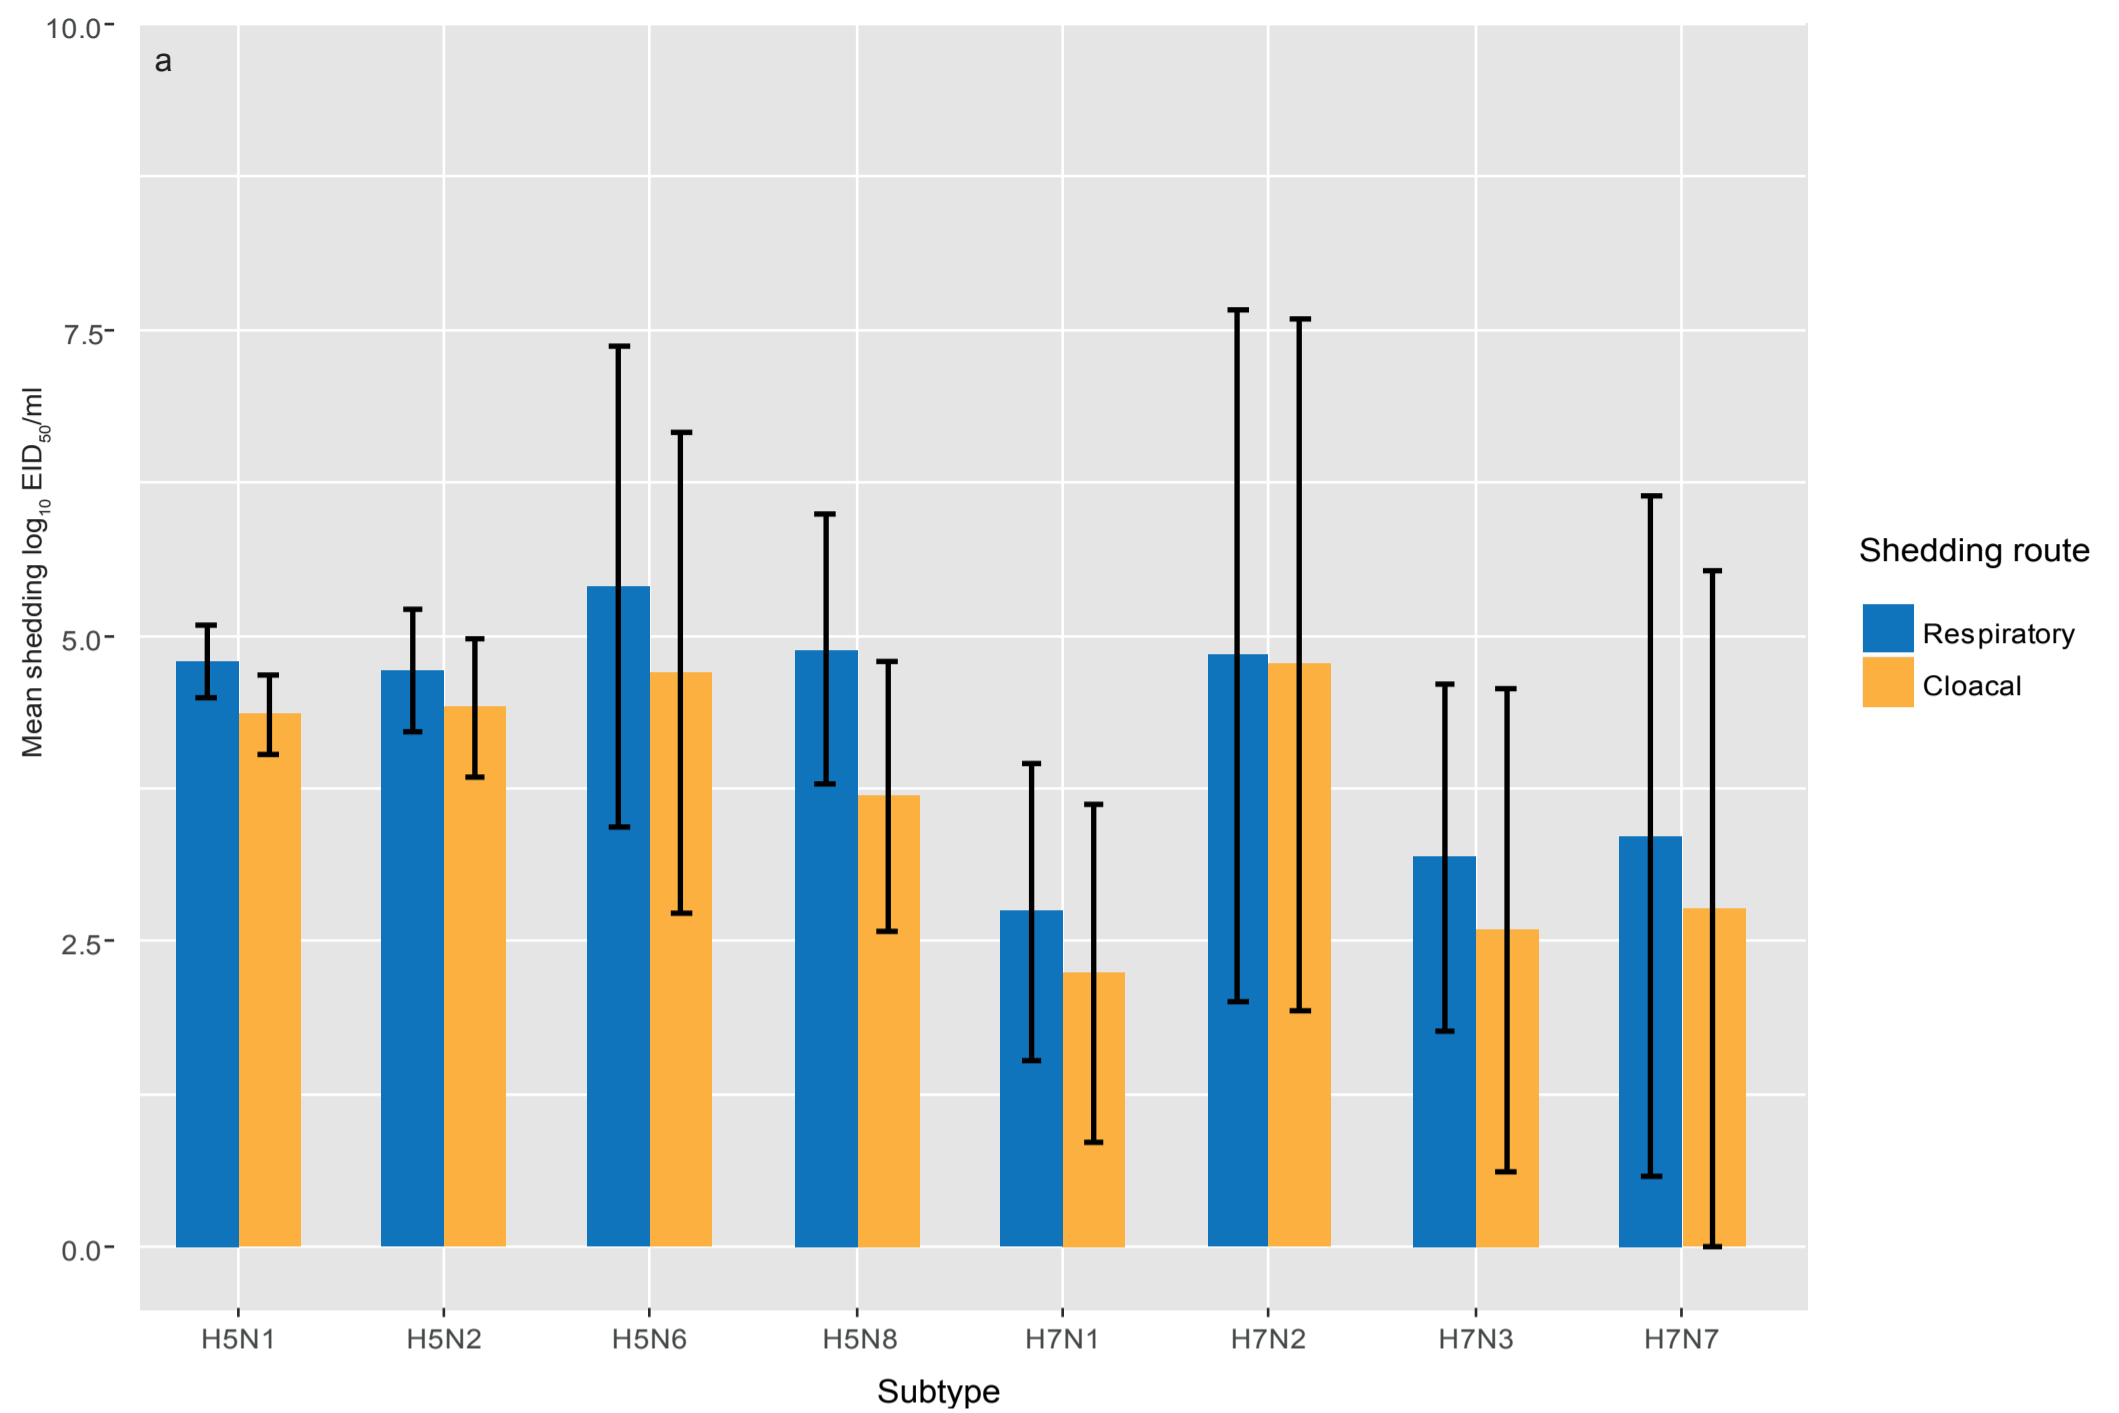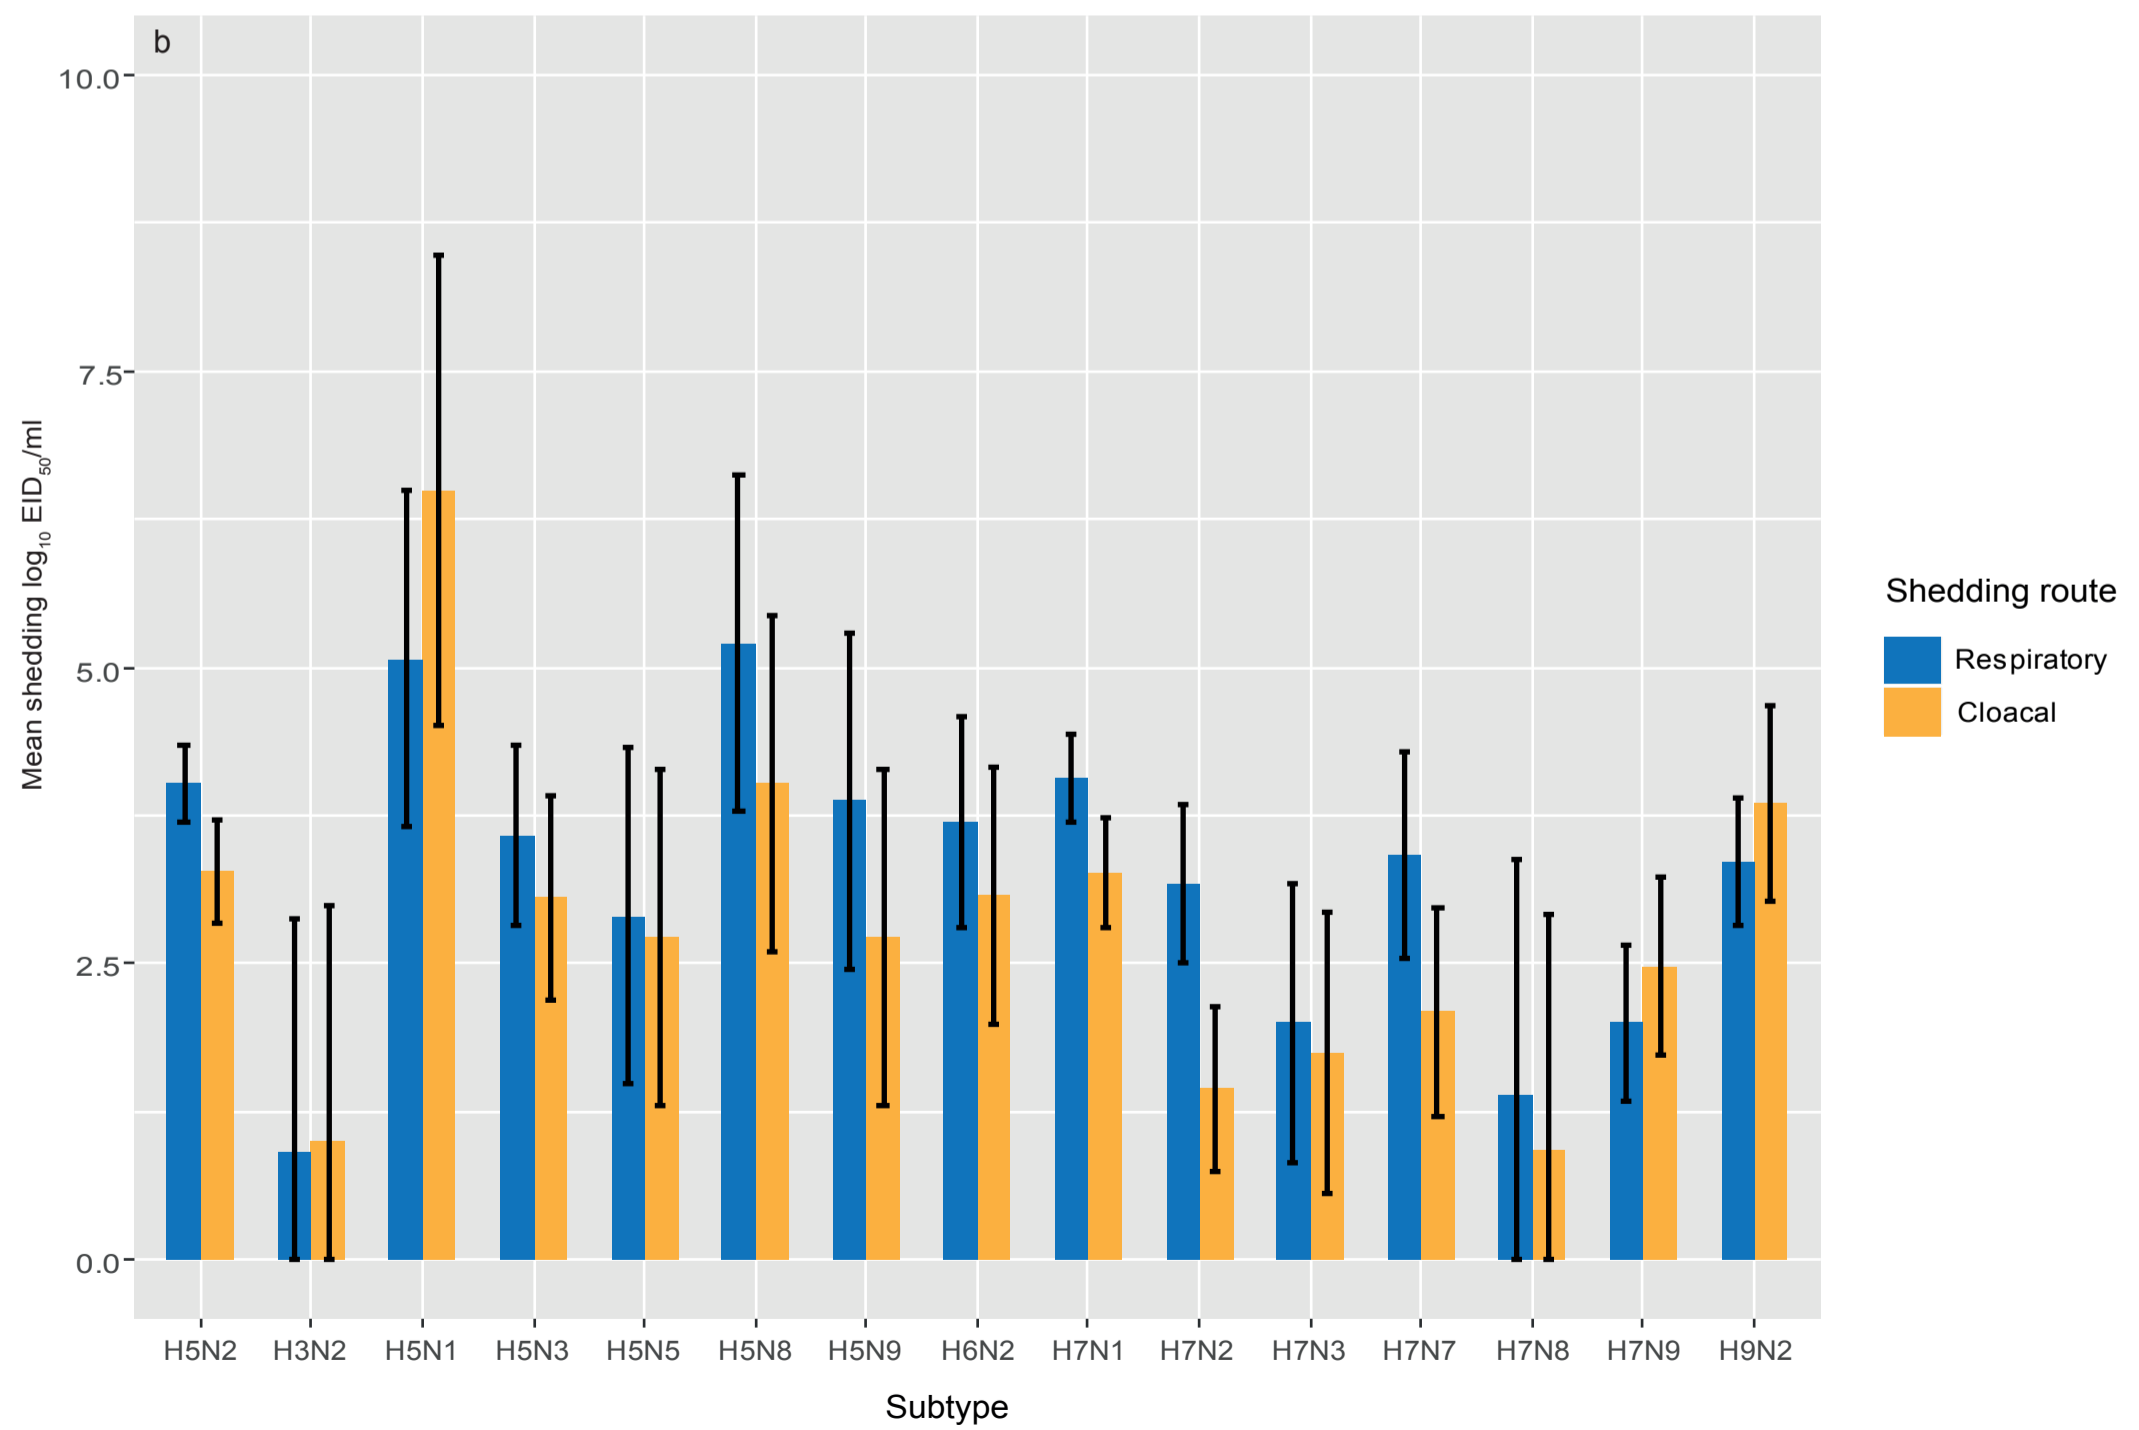

Supplement: s1 [file s1]
